# Motor guidance by long-range communication through the microtubule highway

Sithara S. Wijeratne<sup>1,2†</sup>, Shane A. Fiorenza<sup>3†</sup>,  
Radhika Subramanian<sup>1,2\*</sup>, and Meredith D. Betterton<sup>3\*</sup>

<sup>1</sup>Department of Genetics, Harvard Medical School, Boston, United States

<sup>2</sup>Department of Molecular Biology, Massachusetts General Hospital, Boston, United States

<sup>3</sup>Department of Physics, University of Colorado Boulder, Boulder, United States

<sup>†</sup>Equal contribution

\*Correspondence and equal contribution: [radhika@molbio.mgh.harvard.edu](mailto:radhika@molbio.mgh.harvard.edu), [mdb@colorado.edu](mailto:mdb@colorado.edu)

## Abstract

Coupling of motor proteins within arrays drives muscle contraction, flagellar beating, chromosome segregation, and other biological processes. Current models of motor coupling invoke either direct mechanical linkage or protein crowding, which rely on short-range motor-motor interactions. In contrast, coupling mechanisms that act at longer length scales remain largely unexplored. Here we report that microtubules can physically couple motor movement in the absence of short-range interactions. The human kinesin-4 Kif4A changes the run-length and velocity of other motors on the same microtubule in the dilute binding limit, when 10-nm-sized motors are separated by microns. This effect does not depend on specific motor-motor interactions because similar changes in Kif4A motility are induced by kinesin-1 motors. A micron-scale attractive interaction potential between motors is sufficient to recreate the experimental results in a computational model. Unexpectedly, our theory suggests that long-range microtubule-mediated coupling not only affects binding kinetics but also motor mechanochemistry. Therefore, motors can sense and respond to motors bound several microns away on a microtubule. These results suggest a paradigm in which the microtubule lattice, rather than being merely a passive track, is a dynamic medium responsive to binding proteins to enable new forms of collective motor behavior.

1 Diverse cellular processes rely on coordinated activity of cytoskeletal motor proteins. For exam-  
2 ple, minifilaments made of multiple myosin motors pull actin filaments together to contract muscle.<sup>1,2</sup>  
3 Similarly, dynein motors line the microtubule doublet and collectively induce the oscillatory beating of  
4 motile flagella.<sup>3,4</sup> “Trains” of motors mediate intraflagellar transport, which is essential for assembly and  
5 maintenance of cilia and flagella.<sup>5,6</sup> Force balance between plus- and minus-end-directed motors that  
6 crosslinks microtubules is a proposed mechanism to maintain mitotic spindle organization.<sup>7–10</sup> Similarly,  
7 tug-of-war between opposite polarity motors underlies bidirectional cargo transport.<sup>11–13</sup> For all of these  
8 processes, the activity of multiple motors is coupled.

9 Currently, the best-understood mechanisms of motor-motor coupling fall into two categories: pro-  
10 tein crowding or mechanical linkage. Motors can be mechanically linked, either by directly binding to  
11 each other or binding to the same cargo. For example, in myosin minifilaments many motors form an  
12 ensemble that collectively generates force to contract muscles against high load.<sup>14</sup> Alternatively, motors  
13 that are densely crowded on cytoskeletal filaments can have altered activity due to short-range steric  
14 interactions and/or cooperativity.<sup>15,16</sup> Kinesin-1 motors form clusters due to short-range attractive in-  
15 teractions, for example.<sup>17,18</sup> Kinesins that regulate microtubule dynamic instability typically accumulate  
16 at microtubule ends where their motility changes. For example, the activity of the kinesin-8 Kip3p is  
17 altered in dense clusters at the ends of microtubules.<sup>19–21</sup> Another prototypical example is the mitotic  
18 spindle-associated kinesin-4 protein Kif4A, which forms clusters at microtubule ends (hereafter referred  
19 to as “end-tags”) and regulates microtubule length.<sup>22–24</sup> Short-range interactions are well-studied and  
20 recognized as important for motor ensemble function. However, whether coupling between proteins at  
21 longer length scales contributes to the organization of motor ensembles remains unclear.

22 Recent work has suggested that motor and non-motor microtubule associated proteins can structurally  
23 alter the tubulin lattice. This raises the possibility of long-range coupling through the microtubule  
24 polymer. Lattice effects are proposed to influence microtubule dynamics directly or indirectly by altering  
25 the activity of regulatory proteins.<sup>25,26</sup> Kinesin-1 motors have been shown to cause lattice defects<sup>27</sup>  
26 and expansion<sup>28</sup> and alter the binding affinity of kinesin-1 to microtubules,<sup>29,30</sup> possibly due to elastic  
27 anisotropy.<sup>31</sup> This effect can result in cooperative binding of kinesins to the same microtubule. Currently,  
28 whether long-distance coupling through the “medium” of the microtubule can affect motile properties  
29 of motor proteins is not known. It further remains unclear whether long-range coupling mechanisms  
30 can dynamically sense and respond to motor density on microtubules, particularly at low concentration.  
31 Finally, whether coupling between proteins at a longer length scale contributes to the formation of  
32 motor ensembles/clusters is unknown. Hence, we have a limited understanding of whether concentration-  
33 dependent long-range coupling might be a general mechanism that determines the spatial organization  
34 of motors on microtubules.

35 In this work, we report unexpected long-range coupling between Kif4A motors on microtubules at low  
36 density. The micron-length-scale coupling leads to a density-dependent change in Kif4A processivity and  
37 speed at picomolar motor concentration, where short-range protein-protein interactions are unlikely. The  
38 results indicate that kinesins can influence the movement of motor molecules that are widely separated  
39 on microtubules, even without physical short-range coupling, oligomerization, external binding partners,  
40 or tubulin post-translational modification. Computational modeling suggests that long range coupling  
41 is likely to affect the mechanochemical stepping cycle of the motor in addition to the binding kinetics.  
42 At higher protein concentration, motor coupling on the nanometer- and the micron-scale co-exists and  
43 results in the organization of microtubule-length-dependent Kif4A end-tags, which is not predicted for  
44 moderately processive motors like Kif4A. These observations enlarge our understanding of how the  
45 microtubule can act as a responsive medium for communication between motors separated on the micron  
46 length scale.

## 47 Results

48 The kinesin-4 motor Kif4A accumulates at microtubule ends, where it binds with high affinity.<sup>23,24</sup>  
49 In contrast to other highly processive kinesins or complexes, such as Kip3p<sup>19–21</sup> or the PRC1-Kif4A  
50 complex,<sup>24</sup> Kif4A alone is only moderately processive, with an average measured run length of about  
51 1  $\mu\text{m}$ .<sup>23</sup> Despite this, previously published data show that Kif4A end-tags are sensitive to overall  
52 microtubule length for microtubules up to 14  $\mu\text{m}$ .<sup>24</sup> To understand how motors could possibly exhibit  
53 length-dependent behavior at length scales an order of magnitude larger than their average run length,  
54 we investigated the formation of end-tags by Kif4A motors.

55 To measure end-tag formation and its dependence on microtubule length and motor concentration,  
56 we reconstituted the activity of Kif4A on single microtubules. For these studies, we used a Total In-

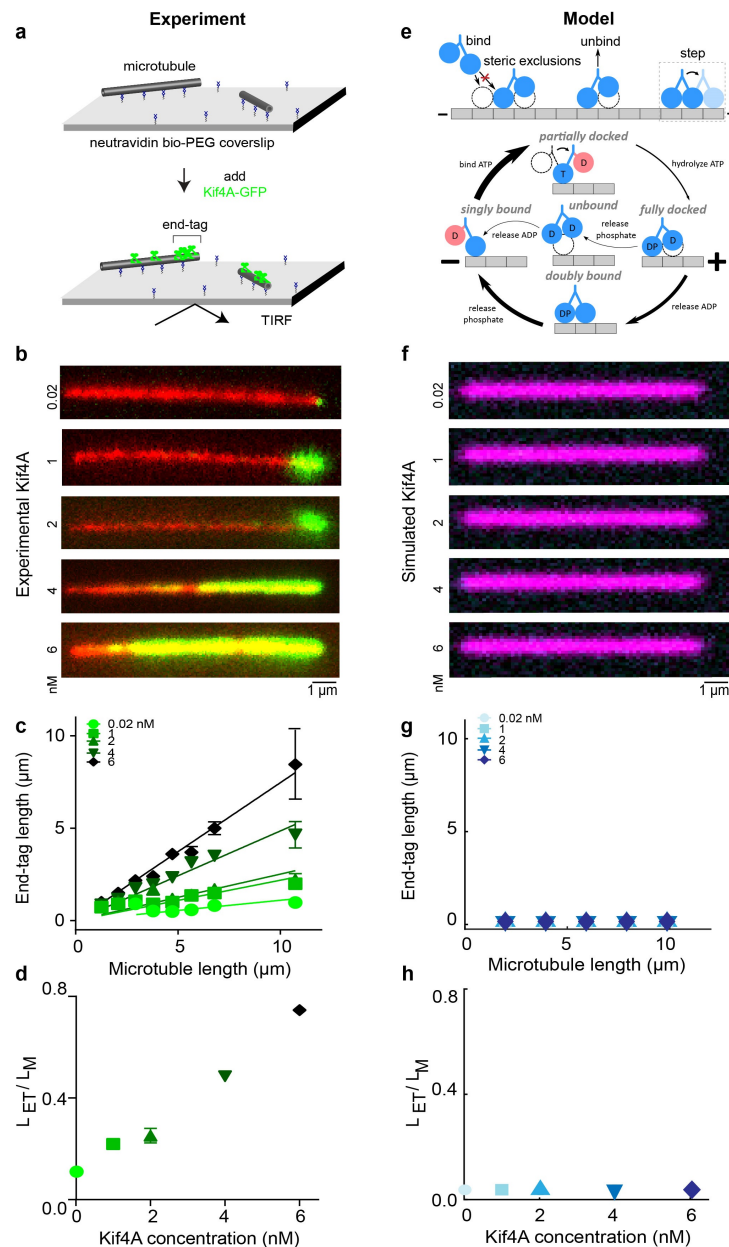

**Figure 1: The kinesin-4 motor Kif4A forms microtubule-length-dependent end-tags, but a minimal motor model does not reproduce the experimental observations.** A. Schematic of the *in vitro* assay used for examining the length dependence of Kif4A-GFP (green) on single microtubules (gray). B. Representative fluorescence micrographs showing end-tag formation with Kif4A-GFP concentration from 0.02 to 6 nM. Images show X-rhodamine labeled microtubules (red) with Kif4A-GFP (green). C. End-tag length versus microtubule length in assays with Kif4A-GFP concentration from 0.02 to 6 nM: 0.02 nM (slope  $0.11 \pm 0.02$ ), 1 nM (slope  $0.22 \pm 0.02$ ), 2 nM (slope  $0.25 \pm 0.03$ ), 4 nM (slope  $0.49 \pm 0.02$ ) and 6 nM (slope  $0.75 \pm 0.02$ ). D. Slope (end-tag length divided by microtubule length) versus Kif4A concentration. E. Model overview. Motors can bind to, unbind from, and step toward the plus ends of microtubules. Steric interactions prevent more than one motor head from occupying a single site. Inset, model mechanochemical cycle. Motor heads can be bound to ADP (D), ATP (T), ADP · Pi (DP), or nothing (empty). Red coloring labels head which cannot bind to the microtubule in these states. Arrow thickness represents the relative probability of each transition. F. Simulated fluorescence images of our model using 10 micron-long microtubules and varying Kif4A concentration from 0.02 to 6 nM. G. Simulated end-tag length versus microtubule length. H. Slope (simulated end-tag length divided by microtubule length) versus Kif4A concentration.

57 ternal Reflection Fluorescence (TIRF) microscopy assay as reported previously.<sup>24,32</sup> First, rhodamine-  
 58 labeled, taxol-stabilized microtubules were biotinylated and immobilized on a glass coverslip (Fig. 1A).  
 59 Next, GFP-tagged Kif4A (0.02 nM) was added to the flow chamber for 5 min and then imaged. Near-  
 60 simultaneous multi-wavelength imaging of rhodamine-labeled microtubules and Kif4A-GFP showed that  
 61 Kif4A preferentially accumulates at the plus-end of microtubules, as observed previously (Fig. 1B).<sup>24</sup>

62 With increasing Kif4A concentration (0.02-6 nM), the length of the end-tags increases. In particular, the  
63 micron-sized end-tags at higher Kif4A concentration (4 nM) resemble those formed from the collective  
64 activity of Kif4A and PRC1 at concentrations of 1.5 nM and 0.1-0.4 nM, respectively.<sup>24</sup> We measured  
65 the end-tag length and intensity over a range of filament lengths up to 13  $\mu\text{m}$  (Fig. 1C, S1A). The data  
66 fit well to a straight line, where the slope corresponds to the fraction of the microtubule length that is  
67 the end-tag (Figure 1D, S1B). These results show microtubule-length dependence of end-tags formed by  
68 Kif4A alone.

69 We sought to understand how Kif4A motors with a run length of only  $\sim 1$  micron can form length-  
70 dependent end-tags on microtubules that are  $\sim 10$  microns long by developing a mathematical model  
71 of Kif4A motion and accumulation on microtubules (supplementary material). We developed a motor  
72 model that includes binding to and unbinding from microtubules, stepping via a mechanochemical cycle,  
73 and steric exclusion. We modeled a single protofilament of the microtubule as a one-dimensional lattice,  
74 where each 8-nm tubulin dimer is represented by a discrete binding site. This model builds on previous  
75 theory of motor accumulation on microtubules and traffic jams.<sup>21,33-39</sup>

76 To investigate how motor coupling might alter Kif4A behavior, we modeled motor stepping with a  
77 mechanochemical cycle driven by ATP hydrolysis, building on previous work.<sup>40-46</sup> We constructed the  
78 model based on the kinesin-1 stepping cycle (Fig. 1E, supplementary material).<sup>47-53</sup> While the details of  
79 which nucleotide state is associated with each conformational state may be different for Kif4A compared  
80 to kinesin-1, our model predictions are similar for any model that includes a basic mechanochemical cycle  
81 that facilitates asynchronous binding and unbinding of two binding heads.<sup>49,54</sup> A general aspect of our  
82 model is that nucleotide hydrolysis rate determines motor velocity and the relative rates of second-head  
83 binding and first-head unbinding determine average motor processivity.

84 To investigate end-tag formation, we start with the premise that accumulation of end-tags requires  
85 that the motors create a crowded region at the plus-end of the microtubule. We assume that no binding  
86 site can be occupied by more than one motor head. If a motor is blocked from stepping forward by  
87 another motor in front of it, the rear head can still unbind, causing the motor to become stuck in the  
88 singly bound state. We constrained parameters of the model using motor processivity and velocity from  
89 previously published data on Xklp1,<sup>23</sup> and the motor on-rate was estimated from experiments imaging  
90 the binding to and motility of Kif4A-GFP on microtubules at low motor density.<sup>24</sup>

91 In our simulations of this minimal model, end-tags do not form and motor accumulation does not  
92 vary with microtubule length (Fig. 1F-H). This is consistent with our intuition that a motor with a run  
93 length of only 1.2  $\mu\text{m}$  cannot show enhanced accumulation on microtubules several microns long.

94 The lack of end-tag formation in the model suggests that the model is missing key mechanisms, such  
95 as interactions between motors that alter their behavior in dense ensembles. We therefore examined  
96 whether cooperative interactions between motors might be required for end-tags. Previous work on  
97 kinesin-1 found that the motors cluster together on microtubules more than would be expected for  
98 purely non-interacting motors.<sup>17,18</sup> These data were consistent with a short-range (nearest-neighbor)  
99 attractive interaction between motors with an estimated energy of 1.6-1.8  $k_B T$ .<sup>17,18</sup> A similar short-  
100 range interaction would be expected if Kif4A can physically interact with nearby motors, perhaps by  
101 binding between motor tails. To test whether such a short-range interaction could lead to end-tags,  
102 we implemented a nearest-neighbor interaction that lowers the motor unbinding rate when motors are  
103 adjacent (supplementary material). We find that short-range cooperativity between adjacent Kif4A  
104 motors is not sufficient for end-tag formation, even if the interaction energy is increased up to 10  $k_B T$   
105 (Fig. S2A). We also tried artificially increasing motor processivity by an order of magnitude (without  
106 short-range interactions), but end-tags still did not form (Fig. S2B). This suggests that another, unknown  
107 mechanism might alter Kif4A motility in ensembles.

108 To investigate how motor density on microtubules might change the motility of Kif4A, we examined  
109 the interaction of single Kif4A-GFP molecules with microtubules with varying concentration of unlabeled  
110 Kif4A (Fig. 2A). We considered two possibilities: at high protein concentration direct protein-protein  
111 interactions might alter motor processivity. Alternatively, the presence of even widely spaced motors  
112 on the microtubule might indirectly alter Kif4A processivity. To distinguish these cases, we studied low  
113 Kif4A concentration, in the picomolar range where direct protein-protein interactions are unlikely. At 20  
114 pM, single Kif4A-GFP molecules moved only short distances before dissociation. However, the addition  
115 of small amounts of additional unlabeled Kif4A (30-400 pM) led to longer unidirectional movements of  
116 individual Kif4A-GFP molecules. When just 60 pM of unlabeled Kif4A was added, the average run  
117 length and lifetime of Kif4A increased by a factor of  $\sim 3$  and  $\sim 4$ , respectively (Fig. 2B, C, E, F), along  
118 with a 2-fold reduction in the average velocity (Fig. 2D, G). These data suggest that even at sub-  
119 nanomolar protein concentration, where Kif4A-Kif4A interactions are not predominant, the processivity

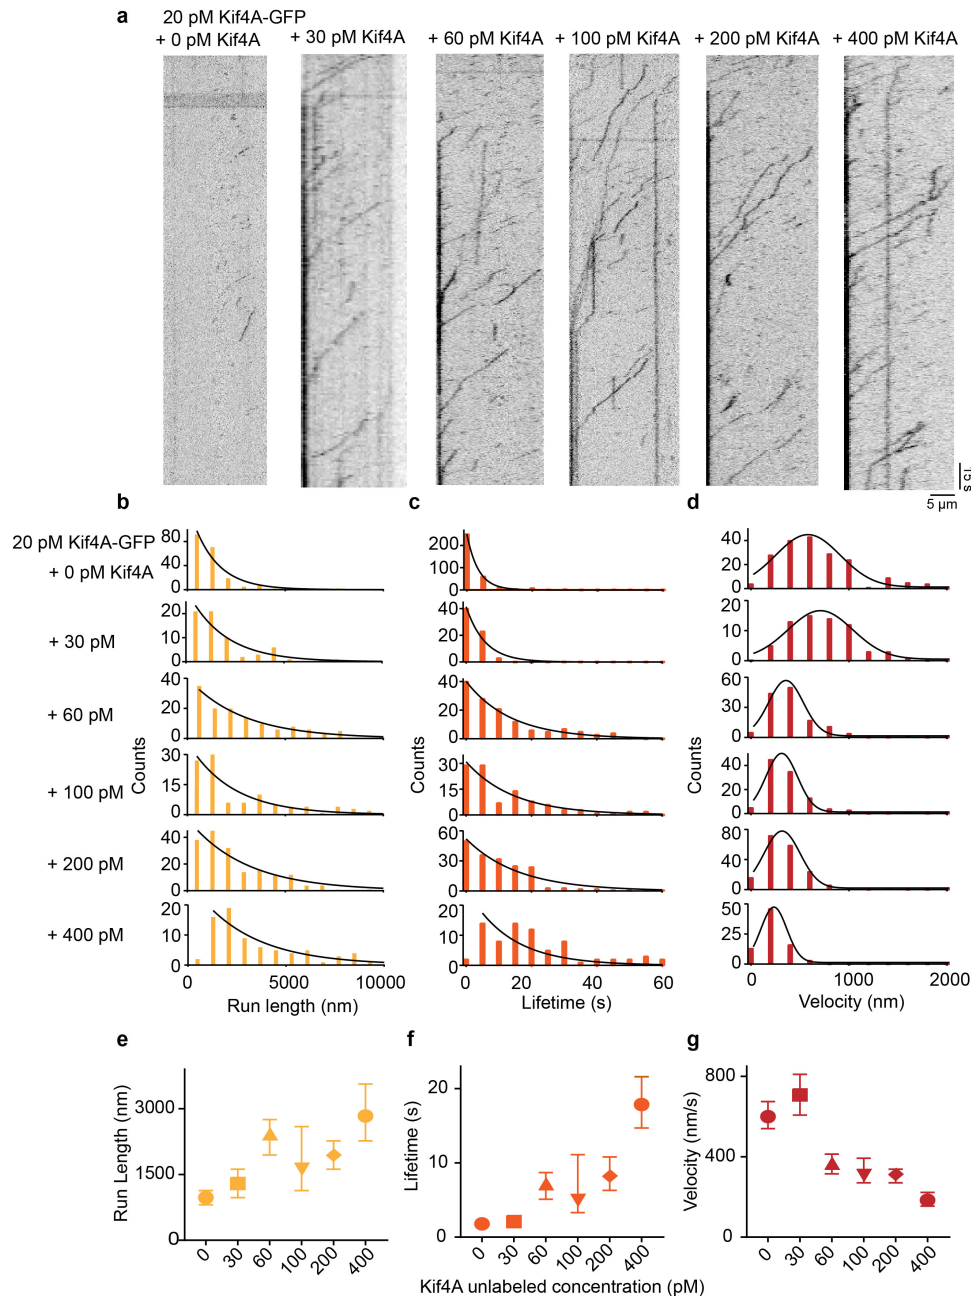

**Figure 2: Single molecule analysis of Kif4A-GFP movement in the presence of Kif4A-unlabeled.** A. Kymographs obtained from time-lapse image sequence acquired in examining microtubule interaction of Kif4A-GFP (20 pM) in presence of 0, 30, 60, 100, 200 and 400 pM Kif4A-unlabeled molecules. B-D. Histograms of the run length (B) lifetime (C) and average velocity (D) obtained from time-lapse image sequence acquired in examining microtubule interaction of Kif4A-GFP (20 pM) in presence of 0, 30, 60, 100, 200 and 400 pM Kif4A-unlabeled molecules. The run length and lifetime histograms were fit to an exponential function. The average velocity histogram was fit to a Gaussian distribution. E. Average run length versus Kif4A concentration, obtained from median in (C): 0 pM (972 nm, N=205), 30 pM (1296 nm, N=66) 60 pM (2430 nm, N=134), 100 pM (1620 nm, N=106), 200 pM (1944 nm, N=182) and 400 pM (2835 nm, N=78). F. Average lifetime versus Kif4A concentration, obtained from the median in (D): 0 pM (1.8 s, N=205), 30 pM (2.1 s, N=66), 60 pM (7.2 s, N=134), 100 pM (4.9 s, N=106), 200 pM (8.3 s, N=182) and 400 pM (17.9 s, N=78). G. Average velocity versus Kif4A concentration, obtained from the median in (E): 0 pM (599 nm/s, N=205), 30 pM (707 nm/s, N=66), 60 pM (368 nm/s, N=134), 100 pM (306 nm/s, N=106), 200 pM (313 nm/s, N=182) and 400 pM (183 nm/s, N=78). The error bars represent 95% confidence interval of the median.

120 and velocity of the motor are sensitive to protein density on microtubules.

121 We then used our mathematical model to ask what mechanisms of motor interaction might explain the  
122 surprising result that Kif4A run length, lifetime, and speed vary with density at picomolar concentration.  
123 We began with the short-range attractive potential discussed above (Fig. S2A). As expected, short-range

124 cooperativity alone is not sufficient to reproduce the low-density data (Fig. 3A-D), even if the interaction  
 125 strength is increased to  $10 k_B T$  (Fig. S3).

126 Therefore, we considered the possibility of long-range interactions between motors. Previous work  
 127 found enhanced binding of kinesin-1 motors near other motors, an effect with a remarkably long range of  $6$   
 128  $\mu m$ .<sup>29</sup> Such a long-range interaction could change motor-microtubule binding kinetics at the low density  
 129 of our experiments, suggesting it as a possible mechanism of motor coupling. We modeled long-range  
 130 motor interactions by adding an attractive quadratic potential between motors with a range of several  
 131 microns (supplementary material). We assumed that the interaction potential from multiple motors is  
 132 additive up to a saturation energy around  $5 k_B T$ . To mimic the interaction observed for kinesin-1, we  
 133 first implemented an effect on motor binding kinetics: the long-range potential increases the binding rate  
 134 and decreases the unbinding rate of other motors (Fig. 3E-H). We note that this effect was included  
 135 in addition to short-range cooperativity discussed above. After fitting the three long-range interaction  
 136 parameters (potential strength, range, and saturation energy) to the experimental data, we found that  
 137 long-range cooperativity in the model predicts changes in motor motility at low density qualitatively  
 138 similar to those found experimentally. However, the best-fit model did not show strong quantitative  
 139 agreement with the data, suggesting that long-range interactions that alter motor-microtubule binding  
 140 kinetics partially but not fully explain the data. Therefore, we considered whether additional mechanisms  
 141 might better explain our low-density results.

142 The data show that Kif4A speed slows by a factor of 2-3 as motor density is increased. This is  
 143 surprising in the absence of dense traffic jams where steric effects predominate, suggesting the possibility

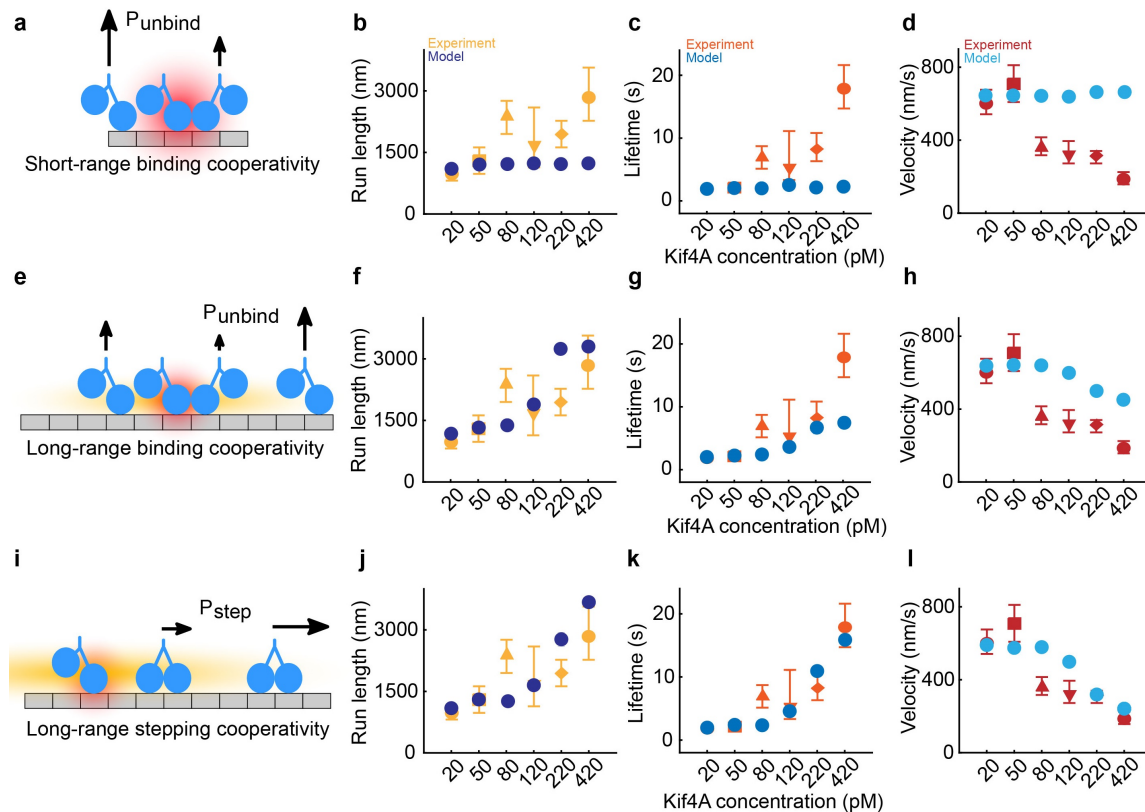

**Figure 3: Long-range cooperativity is essential in the model and must affect motor stepping to fully reproduce the experimental results.** A. Schematic of short-range cooperativity. The red cloud shows the range of the interaction, and the length of arrows shows relative event probability. In the model, short-range interactions decrease motor unbinding but does not affect binding. B-D. Motor run length, lifetime, and velocity versus motor concentration for simulation (blue) and experiment (orange, red). E. Schematic of long-range cooperativity. The orange cloud shows the range of the interaction (not to scale, simulated range is  $8 \mu m$ ). Long-range cooperativity affects motor binding and unbinding and is implemented in addition to short-range cooperativity. F-H. Motor run length, lifetime, and velocity versus motor concentration for simulation (blue) and experiment (orange, red). I. Schematic of long-range cooperativity in stepping. The long-range cooperativity lowers motor velocity in addition to binding and unbinding. Short-range cooperativity remains in the model. J-L. Motor run length, lifetime, and velocity versus motor concentration for simulation (blue) and experiment (orange, red).

144 that a long-range interaction between motors might alter motor mechanochemistry. To be consistent with  
145 our data, such a mechanism would lead to decreased speed of motors coupled through the long-range  
146 interaction. Many mechanisms of slowing motor stepping are possible. One possibility would be changes  
147 in the doubly bound motor off- and ATP-binding rates due to the long-range interaction (Figure 1E,  
148 supplementary material). With this addition, the best-fit model agrees well with our experimental data  
149 (Fig 3I-L). Other mechanisms for which the long-range interaction causes motors to slow their stepping  
150 will have similar effects. These results show that long-range coupling between motors that affects both  
151 binding kinetics and motor stepping can explain the alteration in Kif4A motility with density.

152 If the long-range motor coupling between Kif4A molecules is mediated by changes to the micro-  
153 tubule lattice, it would be predicted to occur with change in density of other kinesins besides Kif4A.  
154 We measured the motility of single Kif4A-GFP molecules in the presence of increasing concentration  
155 (30-400 pM) of unlabeled *D. melanogaster* kinesin-1 dimers (amino acids 1-401; referred to as K401).  
156 K401 is a minimal kinesin-1 dimer comprising the motor domain, neck linker and the first dimerization  
157 coiled-coil domain.<sup>55</sup> When the total motor concentration was increased by adding unlabeled K401,  
158 single Kif4A-GFP molecules moved more processively and exhibited long unidirectional runs (Fig. 4).  
159 When we added 60 pM of unlabeled K401 to an assay with 20 pM Kif4A-GFP, the average run length  
160 and lifetime increased by a factor of 2 and 4, respectively, while the average velocity decreased. These  
161 results show Kif4A processivity and velocity are sensitive to the density of a non-interacting motor of  
162 a different kinesin family. Because K401 lacks the C-terminal cargo binding domains typically respon-  
163 sible for protein-protein interactions in kinesins, these data support the idea that the motor coupling  
164 interactions that impact Kif4A motility likely do not arise from short-range protein-protein interactions.  
165 Additionally, single-molecule intensity measurements confirm that oligomerization or similar phenomena  
166 are not occurring (Fig. S4). Together, our experimental results with varying Kif4A and K401 density  
167 and our modeling results suggest that motility of single Kif4A motors is modulated by coupling of motors  
168 separated by microns along the microtubule.

169 Comparison of the low-density experimental results to our model suggests that a combination of short-  
170 and long-range cooperativity can explain the increase in Kif4A processivity and decrease in velocity as  
171 motor density increases on microtubules. We next asked whether these interactions are sufficient to  
172 explain the formation of end-tags on microtubules at high density. To do this we used the model to  
173 predict high-density Kif4A behavior with no free parameters: we increased the Kif4A concentration  
174 in the simulation, while maintaining the model parameters determined by fitting the low-density data.  
175 Remarkably, the model predicts end-tags that quantitatively match those found experimentally (Fig.  
176 5A-D). The model end-tag length increases both with microtubule length and motor concentration, as  
177 in experiments. To further dissect which interactions in the model are most important for end-tag  
178 formation, we turned off parts of the model individually. Removing individual cooperative interactions  
179 from the model (corresponding to turning off short-range cooperativity, long-range cooperativity that  
180 affects binding, or long-range cooperativity that affects mechanochemistry) decreases end-tag formation  
181 (Fig. S5). This suggests that the combination of both long- and short-range motor coupling that we  
182 identified in the low-density model combine to allow Kif4A to form end-tags. In the model, the long-  
183 range interaction helps increase processivity so that motors reach the end of the microtubule, while the  
184 short-range interaction prevents unbinding to maintain motors in the end-tag.

185 Based on our modeling results, we propose that long-range motor coupling between Kif4A molecules  
186 that increases processivity and lowers velocity contributes to the formation of dense end-tags on micro-  
187 tubules. The model predicts that near and in the end-tag, the bound lifetime of Kif4A increases and  
188 its speed drops. To examine whether these changes occur in end-tags, we directly visualized processive  
189 movement of single Kif4A molecules at high protein concentration by spiking in Kif4A-GFP (1 nM)  
190 with Kif4A-Alexa647 (7 nM) while observing end-tag formation in real time (Fig. 5E). In these exper-  
191 iments, end-tag formation initiates at the microtubule plus-end and grows toward the minus-end until  
192 a steady-state end-tag length is established. Outside the end-tag, motors move processively with long  
193 plus-end-directed runs (~5000 nm or longer). Motor velocity in the untagged region of the microtubule  
194 was 110 nm/s, but upon encountering the high-density end-tag, Kif4A-GFP slowed to 25 nm/s. These  
195 results suggest that, consistent with our model predictions, end-tag formation occurs through an increase  
196 in Kif4A processivity at high concentration along with a reduction in velocity and dissociation in the  
197 end-tags.

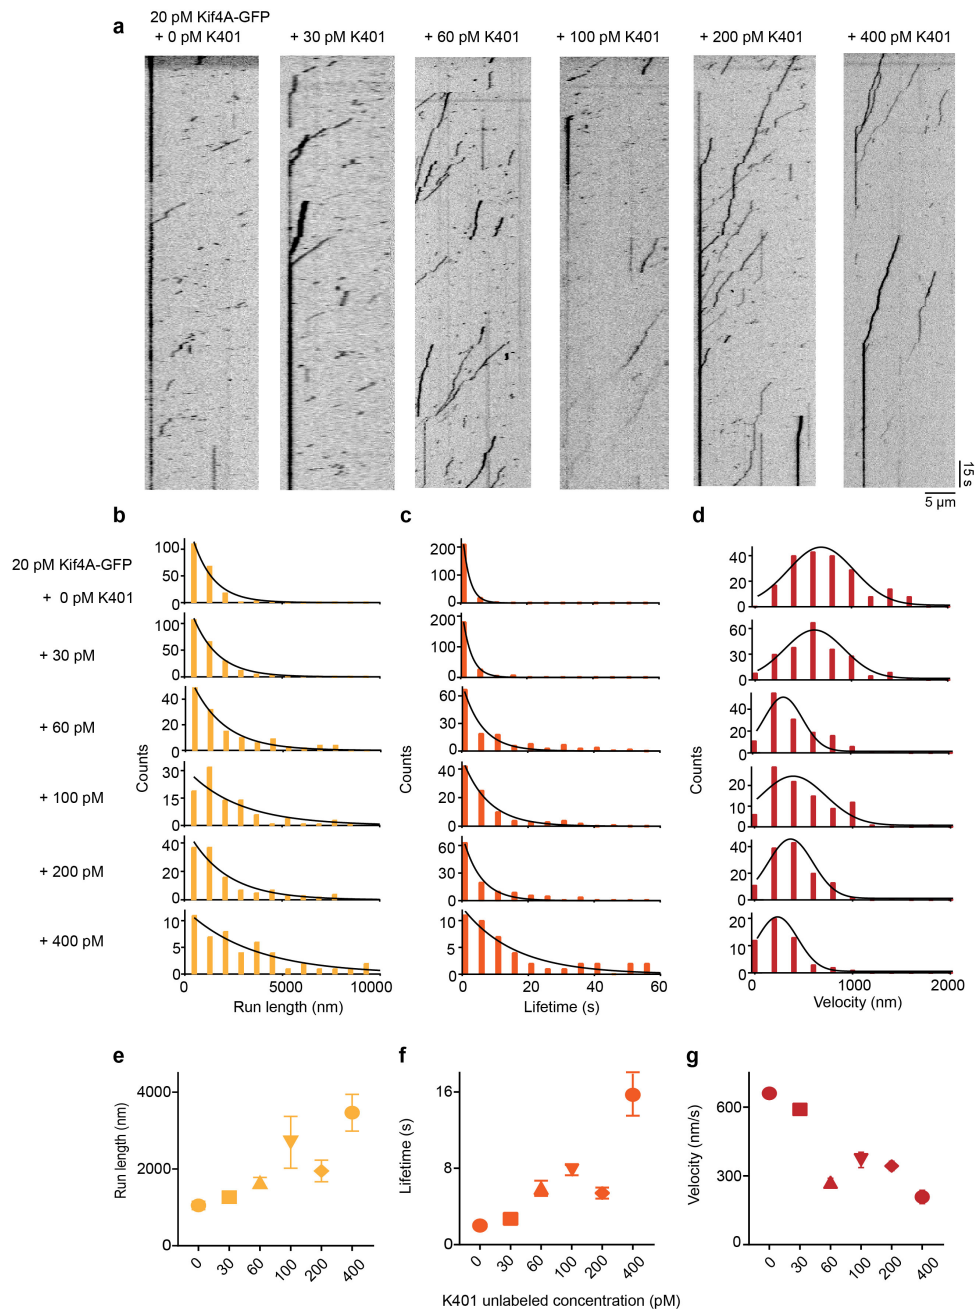

**Figure 4: Single-molecule analysis of Kif4A-GFP movement in the presence of K401-unlabeled.** A. Kymographs obtained from time-lapse image sequence of microtubules with Kif4A-GFP (20 pM) in presence of 0 pM K401-unlabeled, 60 pM K401-unlabeled, 100 pM K401-unlabeled, 200 pM K401-unlabeled and 400 pM K401-unlabeled. B-D. Histograms of the run length (B), lifetime (C), and average velocity (D) obtained from time-lapse image sequence of Kif4A-GFP (20 pM) in presence of 0 pM K401-unlabeled, 60 pM K401-unlabeled, 100 pM K401-unlabeled, 200 pM K401-unlabeled and 400 pM K401-unlabeled. Run length and lifetime histograms were fit to an exponential function. The average velocity histogram was fit to a Gaussian distribution. E. Average run length versus K401 concentration, obtained from the median in (B): 0 pM (810 nm, N=202), 30 pM (972 nm, N=228), 60 pM (1458 nm, N=140), 100 pM (1620 nm, N=96), 200 pM (1296 nm, N=129) and 400 pM (2430 nm, N=51). F. Average lifetime versus K401 concentration, obtained from the median in (C): 0 pM (1.2 s, N=202), 30 pM (1.5 s, N=228), 60 pM (4.2 s, N=140), 100 pM (3.9 s, N=96), 200 pM (3.6 s, N=129) and 400 pM (9 s, N=51). G. Average velocity versus K401 concentration, obtained from the median in (D): 0 pM (706 nm/s, N=202), 30 pM (583 nm/s, N=228), 60 pM (324 nm/s, N=140), 100 pM (402 nm/s, N=96), 200 pM (360 nm/s, N=129) and 400 pM (233, N=51). The error bars represent 95% confidence interval of the median.

## 198 Discussion

199 Here we describe motor communication that spans microns without the usual physically linked as-  
 200 sembly. We discovered these interactions for Kif4A, a kinesin-4 motor known to cluster at microtubule



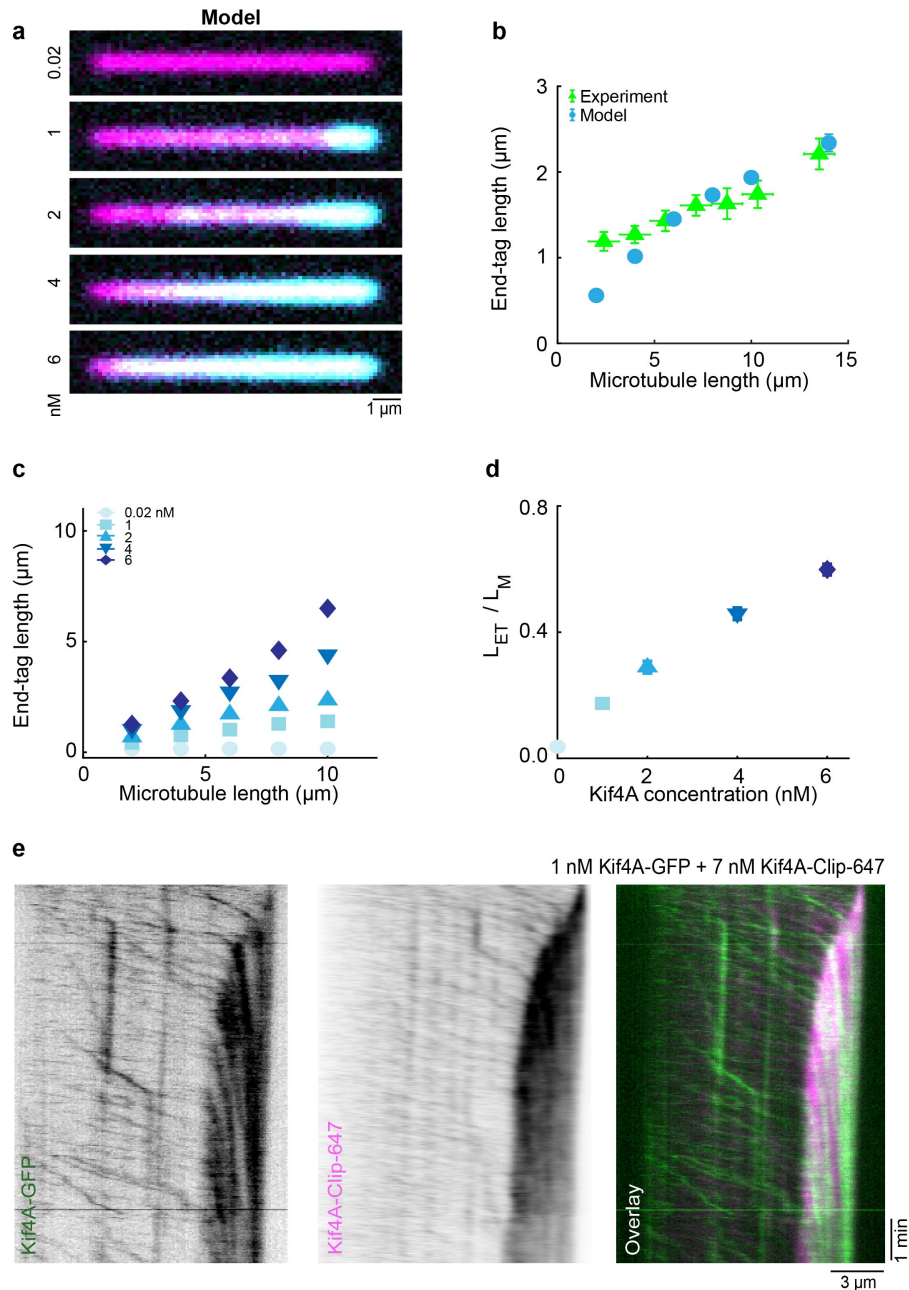

**Figure 5: The computational model with long-range cooperativity that fits low-density experiments predicts length-dependent end-tags and Kif4A motility changes with no free parameters.** A. Simulated fluorescence images created from the model of 10  $\mu$ m microtubules with varying Kif4A concentration. B. End-tag length versus microtubule length from simulations with long-range cooperativity (blue) and experiment (green). C. Simulated end-tag length versus microtubule length with long-range cooperativity. D. Simulated slope of end-tag length divided by microtubule length versus Kif4A concentration. E. Kymographs obtained from time-lapse sequence acquired in spiking experiments of Kif4A-Clip-647 (7 nM) in presence of Kif4A-GFP (1 nM) on single microtubule.

201 ends, but the changes in Kif4A motility can also be induced by kinesin-1 motors. Our findings sug-  
 202 gest that long-range coupling of motors through the microtubule can impact both the binding and  
 203 mechanochemistry of motor proteins at low density. Thus, the microtubule can act as an allosteric  
 204 medium for microtubule-associated kinesins to sense the number of motors on the same microtubule.  
 205 This coupling can set up a positive feedback loop whereby motors adaptively increase their processivity,  
 206 even at picomolar concentration where motors are typically microns apart.

207 Our work expands the way we think about microtubules as a medium for allosteric coupling and how  
 208 it can affect motor proteins. Long-range coupling between motors is required to explain motor-density-  
 209 dependent changes in processivity at picomolar concentration. At these concentrations, a minimal com-

210 putational model that utilizes a conventional-kinesin stepping cycle and a short-range attractive potential  
211 (such as that arising from traffic jams at high concentration and protein-protein interaction) cannot ex-  
212 plain the experimental observations. This is because the widely spaced motors hardly ever come close  
213 enough to each other for short-range interactions to occur (Movie S1). Long-range interactions may have  
214 the advantage of allowing motors with individually low processivity to change their collective behavior  
215 without any hindrance resulting from direct physical interactions. Interestingly, the increase in proces-  
216 sivity from long-range interactions at low density leads to clustering of motors at the microtubule ends at  
217 higher concentration, resulting in the formation of microtubule-length-dependent end-tags. While motor  
218 binding proteins can increase motor processivity and lead to clustering, long-range coupling provides a  
219 motor-autonomous mechanism to increase protein density on the microtubule.

220 The observed effects on motor velocity as a function of density at low concentration cannot be  
221 fully explained by a mechanism whereby the long-distance coupling affects only the binding-unbinding  
222 kinetics of the motor-microtubule interaction. By contrast, our computational model suggests that long-  
223 range cooperativity affects motor mechanochemistry directly. This model satisfactorily reproduces the  
224 experimental data at both low (0.002 nM) and high (6 nM) Kif4A concentration with no change in model  
225 parameters, which argues that both single-motor properties (such as processivity) and emergent behavior  
226 of motor ensembles (such as end-tag formation) require long-range coupling between motors. This differs  
227 from previous results on kinesin-1 both because of the strong effect on Kif4A motility and because the  
228 changes occur for much lower motor concentration for Kif4A (tens of picomolar) versus kinesin-1 (tens  
229 of nanomolar).<sup>29,30</sup> As a result, long-range motor coupling can drive end-tag formation for Kif4A but  
230 not kinesin-1. Thus, the long-range coupling mechanism can increase the diversity in the outcome of the  
231 collective motor activity on microtubules depending on the properties of individual proteins.

232 Previous work has proposed that conformational changes in tubulin heterodimers mediated by the  
233 binding of microtubule-associated proteins can act as an allosteric coupler within the microtubule lat-  
234 tice.<sup>25,26</sup> Our findings broaden the scenario in which these effects are relevant by suggesting that the  
235 molecular and structural alterations mediating microtubule allosteric coupling do not require a satu-  
236 rated microtubule lattice and are reversible on the time scale of seconds. Therefore, long-distance  
237 coupling can be achieved without requiring long-term alteration of the microtubule lattice. In contrast,  
238 mechanisms such as tubulin isoform diversity, post-translational modification, and protofilament reg-  
239 ister shifts are long-lived or irreversible structural/biochemical changes to the microtubule. Transient  
240 motor-autonomous long-distance coupling might confer a unique advantage, as microtubules can quickly  
241 respond to changes in protein concentration to regulate kinesin motility.

242 The long-range coupling we describe has significant implications for motor-based cellular processes  
243 because only a small number of motors need to bind on a microtubule to trigger a cascade (Movie  
244 S2). For example, in the context of intracellular transport, long-range coupling may facilitate changes  
245 in velocity, motor force-velocity relation, or the outcome of tug-of-war between opposing motors, on a  
246 specific subset of cellular microtubules. Beyond coupling between motors, the long-range effects may  
247 also impact microtubule ends to control dynamic instability. For example, increased Kif4A processivity  
248 can increase the protein concentration at microtubule ends, which could then alter the polymerization of

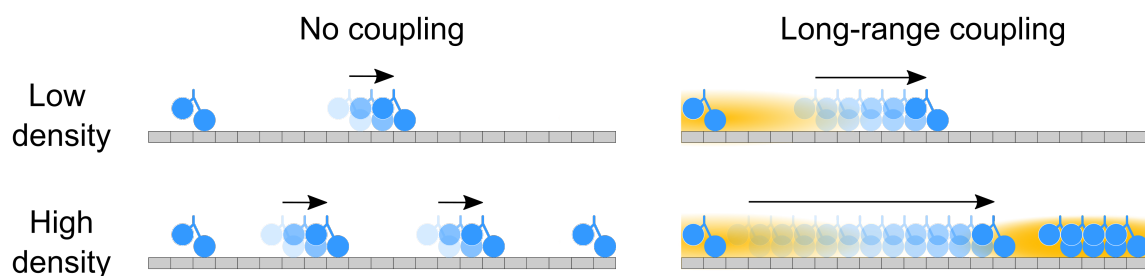

Figure 6: **Illustration of effects of long-range motor coupling.** Schematic shows motors (blue) moving on microtubule (gray) with interaction region (orange cloud, not to scale). Length of arrows represents motor run length (not to scale). (Top left) Non-interacting motors do not affect the run length or velocity of other motors. (Top right) Long-range interactions mean that Kif4A changes the run-length and velocity of widely separated motors on the same microtubule. Our theory suggests that this long-range coupling affects not only binding kinetics, but also motor mechanochemistry. (Lower left) Non-interacting motors do not change their motility or collective behavior at higher density. (Lower right) Long-range coupling promotes the formation of Kif4A end-tags at high density. The microtubule therefore responds dynamically to motor binding and alters the behavior of other motors, allowing new forms of collective motor behavior.

249 dynamic microtubules.<sup>23</sup> Thus low-density, long-distance interactions may allow motors to self-organize  
250 without physical short-range coupling, oligomerization, binding partners, or tubulin post-translational  
251 modifications. This kind of coupling can make kinesin motors more adaptable, allowing them to perform  
252 different functions depending on the surrounding environment and local motor concentration in cells.

253 Our results suggest a new view in which the microtubule is not a passive highway on which motors  
254 move, but instead a responsive medium that couples motors moving along it. Motors moving along  
255 microtubules may therefore be analogous to other physical systems in which new forms of collective  
256 behavior occur due to coupling through a medium, such as Cooper-paired electrons in a superconductor,<sup>56</sup>  
257 diffusion of atoms of the surface of a crystal,<sup>57</sup> liquid-liquid phase separation in an elastic gel,<sup>58,59</sup> and  
258 interactions of active particles through a granular medium.<sup>60</sup>

## 259 Methods

260 **Protein purification.** Recombinant proteins (Kif4A, Kif4A-GFP, Kif4A-CLIP and K401) were ex-  
261 pressed and purified as described previously.<sup>24,61</sup> For CLIP protein labeling, purified protein was incu-  
262 bated with CLIP-Surface™ 647 in a 1:3 (protein:dye) molar ratio, at 30°C for 1 hr, followed by incubation  
263 at 4°C overnight. Unbound dye was removed by repeated dilution and centrifugation through an Am-  
264 icon® Ultra-15 Centrifugal Filter Unit (Millipore Sigma), prior to size exclusion chromatography. A  
265 comparison of the absorbance of pure labeled protein at 650 nm and 280 nm yielded a labeling efficiency  
266 of 15-20%.

267 **Microtubule polymerization.** Taxol-stabilized rhodamine-labeled microtubules were prepared with  
268 biotin tubulin as described previously.<sup>24</sup> Briefly, GMPCPP seeds were prepared from a mixture of  
269 unlabeled bovine tubulin, X-rhodamine-tubulin and biotin tubulin, which were diluted in BRB80 buffer  
270 (80 mM PIPES pH 6.8, 1.5 mM MgCl<sub>2</sub>, 0.5 mM EGTA, pH 6.8) and mixed together by tapping gently.  
271 The tube was transferred to a 37°C heating block and covered with foil to reduce light exposure. The  
272 biotinylated microtubules were incubated for 1 hr 45 min. Afterwards, 100 µL of warm BRB80 buffer  
273 was added to the microtubules and spun at 75000 rpm, 10 min, and 37°C to remove free unpolymerized  
274 tubulin. Following the centrifugation step, the supernatant was discarded, and the pellet was washed by  
275 round of centrifugation with 100 µL BRB80 supplemented with 20 µM taxol. The pellet was resuspended  
276 in 16 µL of BRB80 containing 20 µM taxol and stored at room temperature covered in foil.

277 **In vitro fluorescence microscopy assay.** The microscope slides (Gold Seal Cover Glass, 24 × 60 mm,  
278 thickness No.1.5) and coverslips (Gold Seal Cover Glass, 18 × 18 mm, thickness No.1.5) were cleaned  
279 and functionalized with biotinylated PEG and non-biotinylated PEG, respectively, to prevent nonspecific  
280 surface sticking, according to standard protocols. Flow chambers were built by applying two strips of  
281 double-sided tape to a slide and applying to the coverslip. Sample chamber volumes were approximately  
282 6–8 µL.

283 Experiments were performed as described previously.<sup>24</sup> To visualize the accumulation of Kif4A on  
284 microtubules, rhodamine-labeled biotinylated were immobilized in a flow chamber coated with neutra-  
285 vidin (0.2 mg/ml). Next, Kif4A-GFP and 1 mM ATP were flushed into the flow chamber in assay  
286 buffer (BRB80 buffer supplemented with 1 mM TCEP, 0.2 mg/ml k-casein, 20 µM taxol, 40 mg/ml  
287 glucose oxidase, 35 mg/ml glucose catalase, 0.5% β-mercaptoethanol, 5% sucrose and 1 mM ATP). The  
288 flow cell was incubated for 10 min before taking snapshots of the microtubule and GFP channel. To  
289 visualize single molecules, Kif4A-GFP and 1 mM ATP were flowed into the chamber in assay buffer and  
290 a time-lapse sequence of images was immediately acquired at a rate of 0.3 frames/s. Data were collected  
291 for 2-4 min. Experiments with K401 were performed using the same method.

292 All experiments were performed on Nikon Ti-E inverted microscope with a Ti-ND6-PFS perfect focus  
293 system equipped with an APO TIRF 100x oil/1.49 DIC objective (Nikon). The microscope was outfitted  
294 with a Nikon-encoded x-y motorized stage and a piezo z-stage, an sCMOS camera (Andor Zyla 4.2), and  
295 two-color TIRF imaging optics (Lasers: 488 nm and 561 nm; Filters: Dual Band 488/561 TIRF exciter).

296 **Image analysis.** ImageJ (NIH) was used to process the image files. Briefly, raw time-lapse images were  
297 converted to tiff files. A rolling ball radius background subtraction of 50 pixels was applied to distinguish  
298 the features in the images more clearly. From these images, individual microtubule single molecule events  
299 were picked and converted to kymographs by the MultipleOverlay and MultipleKymograph plug-ins (J.  
300 Reitdorf and A. Seitz). We then extracted parameters such as run length and lifetime, and calculated the  
301 average velocity (run length/lifetime), for each single molecule track. We only included moving single  
302 molecule events and excluded stalled events from the analysis.

## 303 Acknowledgements

304 We thank Matthew Glaser, Dick McIntosh, Michael Shelley, and Daniel Needleman for useful discussions.  
305 We thank Nandini Mani for help with protein purification. This work was funded by NSF grants DMR-  
306 1725065 (MDB), NIH grants R01GM124371 (MDB) and 1DP2GM126894 (RS). Simulations used the  
307 Summit supercomputer, supported by NSF grants ACI-1532235 and ACI-1532236.

## 308 References

- 309 [1] H.E. Huxley and W. Brown. The low-angle X-ray diagram of vertebrate striated muscle and its  
310 behaviour during contraction and rigor. *Journal of Molecular Biology*, 30(2):383–IN16, December  
311 1967.
- 312 [2] Roger Craig and John L Woodhead. Structure and function of myosin filaments. *Current Opinion*  
313 *in Structural Biology*, 16(2):204–212, April 2006.
- 314 [3] I. R. Gibbons and A. J. Rowe. Dynein: A Protein with Adenosine Triphosphatase Activity from  
315 Cilia. *Science*, 149(3682):424–426, July 1965.
- 316 [4] T. J. Mitchison and H. M. Mitchison. How cilia beat. *Nature*, 463(7279):308–309, January 2010.
- 317 [5] K. G. Kozminski, K. A. Johnson, P. Forscher, and J. L. Rosenbaum. A motility in the eukary-  
318 otic flagellum unrelated to flagellar beating. *Proceedings of the National Academy of Sciences*,  
319 90(12):5519–5523, June 1993.
- 320 [6] Bram Prevo, Jonathan M. Scholey, and Erwin J. G. Peterman. Intraflagellar transport: Mechanisms  
321 of motor action, cooperation, and cargo delivery. *The FEBS Journal*, 284(18):2905–2931, 2017.
- 322 [7] W. Saunders, V. Lengyel, and M. A. Hoyt. Mitotic spindle function in *Saccharomyces cerevisiae*  
323 requires a balance between different types of kinesin-related motors. *Molecular Biology of the Cell*,  
324 8(6):1025–1033, June 1997.
- 325 [8] E.N. Cytrynbaum, J.M. Scholey, and A. Mogilner. A Force Balance Model of Early Spindle Pole  
326 Separation in *Drosophila* Embryos. *Biophysical Journal*, 84(2):757–769, February 2003.
- 327 [9] Viktoriya Syrovatkina, Chuanhai Fu, and Phong T. Tran. Antagonistic Spindle Motors and MAPs  
328 Regulate Metaphase Spindle Length and Chromosome Segregation. *Current Biology*, 23(23):2423–  
329 2429, December 2013.
- 330 [10] Robert Blackwell, Christopher Edelmaier, Oliver Sweezy-Schindler, Adam Lamson, Zachary R.  
331 Gergely, Eileen O’Toole, Ammon Crapo, Loren E. Hough, J. Richard McIntosh, Matthew A. Glaser,  
332 and Meredith D. Betterton. Physical determinants of bipolar mitotic spindle assembly and stability  
333 in fission yeast. *Science Advances*, 3(1):e1601603, January 2017.
- 334 [11] Michael A. Welte. Bidirectional transport along microtubules. *Current biology: CB*, 14(13):R525–  
335 537, July 2004.
- 336 [12] Melanie J. I. Müller, Stefan Klumpp, and Reinhard Lipowsky. Tug-of-war as a cooperative mech-  
337 anism for bidirectional cargo transport by molecular motors. *Proceedings of the National Academy*  
338 *of Sciences*, 105(12):4609–4614, March 2008.
- 339 [13] N. D. Derr, B. S. Goodman, R. Jungmann, A. E. Leschziner, W. M. Shih, and S. L. Reck-Peterson.  
340 Tug-of-War in Motor Protein Ensembles Revealed with a Programmable DNA Origami Scaffold.  
341 *Science*, 338(6107):662–665, November 2012.
- 342 [14] Marco Linari, Elisabetta Brunello, Massimo Reconditi, Luca Fusi, Marco Caremani, Theyencheri  
343 Narayanan, Gabriella Piazzesi, Vincenzo Lombardi, and Malcolm Irving. Force generation by skeletal  
344 muscle is controlled by mechanosensing in myosin filaments. *Nature*, 528(7581):276–279, December  
345 2015.
- 346 [15] Cécile Leduc, Kathrin Padberg-Gehle, Vladimír Varga, Dirk Helbing, Stefan Diez, and Jonathon  
347 Howard. Molecular crowding creates traffic jams of kinesin motors on microtubules. *Proceedings of*  
348 *the National Academy of Sciences*, 109(16):6100–6105, April 2012.

- 349 [16] Daniël M. Miedema, Vandana S. Kushwaha, Dmitry V. Denisov, Seyda Acar, Bernard Nienhuis,  
350 Erwin J. G. Peterman, and Peter Schall. Correlation Imaging Reveals Specific Crowding Dynamics  
351 of Kinesin Motor Proteins. *Physical Review X*, 7(4):041037, November 2017.
- 352 [17] Andrej Vilfan, Erwin Frey, Franz Schwabl, Manfred Thormählen, Young-Hwa Song, and Eck-  
353 hard Mandelkow. Dynamics and cooperativity of microtubule decoration by the motor protein  
354 kinesin11 Edited by W. Baumeister. *Journal of Molecular Biology*, 312(5):1011–1026, October 2001.
- 355 [18] Wouter H. Roos, Otger Campàs, Fabien Montel, Günther Woehlke, Joachim P. Spatz, Patricia  
356 Bassereau, and Giovanni Cappello. Dynamic kinesin-1 clustering on microtubules due to mutually  
357 attractive interactions. *Physical Biology*, 5(4):046004, November 2008.
- 358 [19] Mohan L. Gupta, Pedro Carvalho, David M. Roof, and David Pellman. Plus end-specific depoly-  
359 merase activity of Kip3, a kinesin-8 protein, explains its role in positioning the yeast mitotic spindle.  
360 *Nature Cell Biology*, 8(9):913–923, September 2006.
- 361 [20] Vladimir Varga, Jonne Helenius, Kozo Tanaka, Anthony A. Hyman, Tomoyuki U. Tanaka, and  
362 Jonathon Howard. Yeast kinesin-8 depolymerizes microtubules in a length-dependent manner. *Nature*  
363 *Cell Biology*, 8(9):957–962, September 2006.
- 364 [21] Vladimir Varga, Cecile Leduc, Volker Bormuth, Stefan Diez, and Jonathon Howard. Kinesin-  
365 8 Motors Act Cooperatively to Mediate Length-Dependent Microtubule Depolymerization. *Cell*,  
366 138(6):1174–1183, September 2009.
- 367 [22] Changjun Zhu and Wei Jiang. Cell cycle-dependent translocation of PRC1 on the spindle by Kif4  
368 is essential for midzone formation and cytokinesis. *Proceedings of the National Academy of Sciences*  
369 *of the United States of America*, 102(2):343–348, January 2005.
- 370 [23] Peter Bieling, Iva Kronja, and Thomas Surrey. Microtubule Motility on Reconstituted Meiotic  
371 Chromatin. *Current Biology*, 20(8):763–769, April 2010.
- 372 [24] Radhika Subramanian, Shih-Chieh Ti, Lei Tan, Seth A. Darst, and Tarun M. Kapoor. Marking and  
373 Measuring Single Microtubules by PRC1 and Kinesin-4. *Cell*, 154(2):377–390, July 2013.
- 374 [25] Marija Zanic, Per O. Widlund, Anthony A. Hyman, and Jonathon Howard. Synergy between  
375 XMAP215 and EB1 increases microtubule growth rates to physiological levels. *Nature Cell Biology*,  
376 15(6):688–693, June 2013.
- 377 [26] Tae Kim and Luke M. Rice. Long-range, through-lattice coupling improves predictions of micro-  
378 tubule catastrophe. *Molecular Biology of the Cell*, 30(12):1451–1462, April 2019.
- 379 [27] Sarah Triclin, Daisuke Inoue, Jeremie Gaillard, Zaw Min Htet, Morgan De Santis, Didier Portran,  
380 Emmanuel Derivery, Charlotte Aumeier, Laura Schaedel, Karin John, Christophe Leterrier, Samara  
381 Reck-Peterson, Laurent Blanchoin, and Manuel Thery. Self-repair protects microtubules from their  
382 destruction by molecular motors. *bioRxiv*, page 499020, December 2018.
- 383 [28] Daniel R. Peet, Nigel J. Burroughs, and Robert A. Cross. Kinesin expands and stabilizes the  
384 GDP-microtubule lattice. *Nature Nanotechnology*, 13(5):386–391, May 2018.
- 385 [29] Etsuko Muto, Hiroyuki Sakai, and Kuniyoshi Kaseda. Long-range cooperative binding of kinesin to  
386 a microtubule in the presence of ATP. *The Journal of Cell Biology*, 168(5):691–696, February 2005.
- 387 [30] Tomohiro Shima, Manatsu Morikawa, Junichi Kaneshiro, Taketoshi Kambara, Shinji Kamimura,  
388 Toshiki Yagi, Hiroyuki Iwamoto, Sotaro Uemura, Hideki Shigematsu, Mikako Shirouzu, Taro  
389 Ichimura, Tomonobu M. Watanabe, Ryo Nitta, Yasushi Okada, and Nobutaka Hirokawa. Kinesin-  
390 binding-triggered conformation switching of microtubules contributes to polarized transport. *J Cell*  
391 *Biol*, page jcb.2017111178, October 2018.
- 392 [31] Ken Sekimoto and Jacques Prost. Elastic Anisotropy Scenario for Cooperative Binding of Kinesin-  
393 Coated Beads on Microtubules. *The Journal of Physical Chemistry B*, 120(26):5953–5959, July  
394 2016.
- 395 [32] Sithara Wijeratne and Radhika Subramanian. Geometry of antiparallel microtubule bundles regu-  
396 lates relative sliding and stalling by PRC1 and Kif4A. *eLife*, 7:e32595, October 2018.

- 397 [33] A. Parmeggiani, T. Franosch, and E. Frey. Totally asymmetric simple exclusion process with Lang-  
398 muir kinetics. *Physical Review E*, 70(4):046101, October 2004.
- 399 [34] L. E. Hough, A. Schwabe, M. A. Glaser, J. R. McIntosh, and M. D. Betterton. Microtubule depoly-  
400 merization by the kinesin-8 motor Kip3p: A mathematical model. *Biophysical Journal*, 96(8):3050–  
401 3064, 2009.
- 402 [35] Louis Reese, Anna Melbinger, and Erwin Frey. Crowding of Molecular Motors Determines Micro-  
403 tubule Depolymerization. *Biophysical Journal*, 101(9):2190–2200, November 2011.
- 404 [36] Hui-Shun Kuan and M. D. Betterton. Biophysics of filament length regulation by molecular motors.  
405 *Physical Biology*, 10(3):036004, June 2013.
- 406 [37] Louis Reese, Anna Melbinger, and Erwin Frey. Molecular mechanisms for microtubule length regu-  
407 lation by kinesin-8 and XMAP215 proteins. *Interface Focus*, 4(6):20140031, December 2014.
- 408 [38] Hui-Shun Kuan and Meredith D. Betterton. Motor Protein Accumulation on Antiparallel Micro-  
409 tubule Overlaps. *Biophysical Journal*, 110(9):2034–2043, May 2016.
- 410 [39] Hui-Shun Kuan and Meredith D. Betterton. Phase-plane analysis of the totally asymmetric simple  
411 exclusion process with binding kinetics and switching between antiparallel lanes. *Physical Review*  
412 *E*, 94(2):022419, August 2016.
- 413 [40] T. Duke and S. Leibler. Motor protein mechanics: A stochastic model with minimal mechanochem-  
414 ical coupling. *Biophysical Journal*, 71(3):1235–1247, September 1996.
- 415 [41] Anatoly B. Kolomeisky, Evgeny B. Stukalin, and Alex A. Popov. Understanding mechanochemical  
416 coupling in kinesins using first-passage-time processes. *Physical Review E*, 71(3):031902, 2005.
- 417 [42] Steffen Liepelt and Reinhard Lipowsky. Kinesin’s Network of Chemomechanical Motor Cycles.  
418 *Physical Review Letters*, 98(25):258102, June 2007.
- 419 [43] Debashish Chowdhury. Modeling Stochastic Kinetics of Molecular Machines at Multiple Levels:  
420 From Molecules to Modules. *Biophysical Journal*, 104(11):2331–2341, June 2013.
- 421 [44] Jason A. Wagoner and Ken A. Dill. Molecular Motors: Power Strokes Outperform Brownian Ratch-  
422 ets. *The Journal of Physical Chemistry B*, 120(26):6327–6336, July 2016.
- 423 [45] Andreja Šarlah and Andrej Vilfan. Minimum requirements for motility of a processive motor protein.  
424 *PLOS ONE*, 12(10):e0185948, October 2017.
- 425 [46] Ryota Takaki, Mauro L. Mugnai, Yonathan Goldtzvik, and D. Thirumalai. How kinesin waits for  
426 ATP affects the nucleotide and load dependence of the stepping kinetics. *Proceedings of the National*  
427 *Academy of Sciences*, 116(46):23091–23099, November 2019.
- 428 [47] D. D. Hackney. Kinesin ATPase: Rate-limiting ADP release. *Proceedings of the National Academy*  
429 *of Sciences*, 85(17):6314–6318, September 1988.
- 430 [48] Wei Hua, Edgar C. Young, Margaret L. Fleming, and Jeff Gelles. Coupling of kinesin steps to ATP  
431 hydrolysis. *Nature*, 388(6640):390–393, July 1997.
- 432 [49] R Cross. The kinetic mechanism of kinesin. *Trends in Biochemical Sciences*, 29(6):301–309, June  
433 2004.
- 434 [50] Ana B Asenjo, Yonatan Weinberg, and Hernando Sosa. Nucleotide binding and hydrolysis induces  
435 a disorder-order transition in the kinesin neck-linker region. *Nature Structural & Molecular Biology*,  
436 13(7):648–654, July 2006.
- 437 [51] Johan OL Andreasson, Bojan Milic, Geng-Yuan Chen, Nicholas R. Guydosh, William O. Hancock,  
438 and Steven M. Block. Examining kinesin processivity within a general gating framework. *eLife*,  
439 4:e07403, April 2015.
- 440 [52] Keith J. Mickolajczyk, Nathan C. Deffenbaugh, Jaime Ortega Arroyo, Joanna Andrecka, Philipp  
441 Kukura, and William O. Hancock. Kinetics of nucleotide-dependent structural transitions in the  
442 kinesin-1 hydrolysis cycle. *Proceedings of the National Academy of Sciences*, 112(52):E7186–E7193,  
443 December 2015.

- 444 [53] Keith J. Mickolajczyk and William O. Hancock. Kinesin Processivity Is Determined by a Kinetic  
445 Race from a Vulnerable One-Head-Bound State. *Biophysical Journal*, 112(12):2615–2623, June 2017.
- 446 [54] William O. Hancock. The Kinesin-1 Chemomechanical Cycle: Stepping Toward a Consensus. *Bio-*  
447 *physical Journal*, 110(6):1216–1225, March 2016.
- 448 [55] Elise Berliner, Edgar C. Young, Karin Anderson, Hansraj K. Mahtani, and Jeff Gelles. Failure of  
449 a single-headed kinesin to track parallel to microtubule protofilaments. *Nature*, 373(6516):718–721,  
450 February 1995.
- 451 [56] B. Keimer, S. A. Kivelson, M. R. Norman, S. Uchida, and J. Zaanen. From quantum matter to  
452 high-temperature superconductivity in copper oxides. *Nature*, 518(7538):179–186, February 2015.
- 453 [57] M. Ø. Pedersen, L. Österlund, J. J. Mortensen, M. Mavrikakis, L. B. Hansen, I. Stensgaard, E. Lægs-  
454 gaard, J. K. Nørskov, and F. Besenbacher. Diffusion of N Adatoms on the Fe(100) Surface. *Physical*  
455 *Review Letters*, 84(21):4898–4901, May 2000.
- 456 [58] Robert W. Style, Tianqi Sai, Nicoló Fanelli, Mahdiye Ijavi, Katrina Smith-Mannschott, Qin Xu,  
457 Lawrence A. Wilen, and Eric R. Dufresne. Liquid-Liquid Phase Separation in an Elastic Network.  
458 *Physical Review X*, 8(1):011028, February 2018.
- 459 [59] Kathryn A. Rosowski, Tianqi Sai, Estefania Vidal-Henriquez, David Zwicker, Robert W. Style, and  
460 Eric R. Dufresne. Elastic ripening and inhibition of liquid–liquid phase separation. *Nature Physics*,  
461 16(4):422–425, April 2020.
- 462 [60] Nitin Kumar, Harsh Soni, Sriram Ramaswamy, and A. K. Sood. Flocking at a distance in active  
463 granular matter. *Nature Communications*, 5(1):4688, September 2014.
- 464 [61] Radhika Subramanian and Jeff Gelles. Two Distinct Modes of Processive Kinesin Movement in  
465 Mixtures of ATP and AMP-PNP. *Journal of General Physiology*, 130(5):445–455, November 2007.
